# Supplementary material
Source: PubMed Central journal article supplement (PMC3605703)

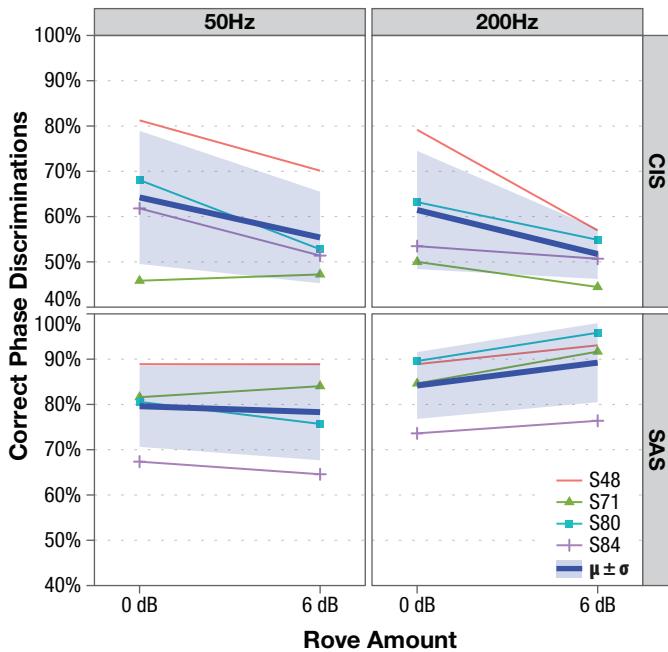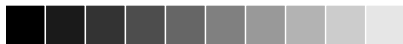

Supplement: NIHMS437176-supplement-01.pdf [file NIHMS437176-supplement-01.pdf]
